# Supplementary material for: Postoperative acute kidney injury in adult non-cardiac surgery: joint consensus report of the Acute Disease Quality Initiative and PeriOperative Quality Initiative
Source: PubMed Central journal article supplement (PMC8367817; doi:10.1038/s41581-021-00418-2), 2021-05-11
Supplement: 41581_2021_418_MOESM1_ESM.pdf [file 41581_2021_418_MOESM1_ESM.pdf]

---

**Supplementary information**

---

**Postoperative acute kidney injury in adult non-cardiac surgery: joint consensus report of the Acute Disease Quality Initiative and PeriOperative Quality Initiative**

---

In the format provided by the authors and unedited

## **Supplementary information**

### **ADQI-24 and POQI-7 Faculty**

#### **Organizers/Chairs**

John Prowle, QMUL, UK (Local Organiser)  
John A. Kellum Pittsburgh, USA  
Andy Shaw, University of Alberta, Canada  
Lui Forni, Surrey University, UK  
Claudio Ronco, University of Padua, Italy

#### **Group 1 (Epidemiology and Pathophysiology)**

Morgan Grams (Chair), Johns Hopkins University, USA  
Mike Grocott (Co-Chair), Southampton University, UK  
Raquel Bartz, Duke University, USA  
Azra Bihorac, University of Florida, USA\*  
Lui Forni, Surrey University, UK

#### **Group 2 (Definitions)**

David McIlroy (Chair), Vanderbilt University, USA  
Mitra Nadim (Co-Chair), USC, USA  
Pat Murray, University College Dublin, Ireland  
Ravi Mehta, USCD, USA  
Andy Shaw, University of Alberta, Canada

#### **Group 3 (Prevention)**

Mark Edwards (Chair), Southampton, UK  
Kathleen Liu (Co-Chair), UCSF, USA  
Tim Miller, Duke University, USA  
Samira Bell, Dundee University, Scotland  
Sean Bagshaw, University of Alberta, Canada  
Michael Joannidis Univ Innsbruck

#### **Group 4 (Treatment)**

Alex Zarbock (Chair), University of Munster, Germany  
Michelle Chew (Co-Chair), Linkoping, Sweden  
Denny Levett, Southampton University, UK  
Monty Mythen, University College London, UK  
Thomas Rimmele, Lyon, France  
Chuck Hobson, University of Florida, USA\*

#### **Group 5 (Outcomes)**

Marlies Ostermann (Chair), King's College UK  
Max Bell (Co-Chair), Karolinska University, Sweden  
Rupert Pearse, QMUL, UK  
TJ Gan, Stony Brook University, USA  
Jay Koyner, University of Chicago, USA  
John Prowle, QMUL, UK

\*Participated in pre-and post-conference activities only

**Supplementary table 1. Incidence and risk factors for AKI after non-cardiac and non-vascular surgery**

| Study                                  | Type of surgery                            | Study design         | No. of Patients | AKI definition                        | AKI incidence | Risk factors for AKI                                                                                                                                          |
|----------------------------------------|--------------------------------------------|----------------------|-----------------|---------------------------------------|---------------|---------------------------------------------------------------------------------------------------------------------------------------------------------------|
| Long (2016) <sup>29</sup>              | Open and laparoscopic abdominal surgery    | Retrospective cohort | 3,902           | KDIGO                                 | 6.8%          | Female gender, hypertension, CKD, ASA IV or V, reoperation                                                                                                    |
| O'Connor (2016) <sup>4</sup>           | Major abdominal surgery                    | Systematic review    | Pooled 82,514   | RIFLE, AKIN, KDIGO                    | 13.4%         | NA                                                                                                                                                            |
| Grams (2016) <sup>31</sup>             | Major surgery                              | Retrospective cohort | 161,185         | KDIGO                                 | 11.8%         | Older age, African American race, hypertension, diabetes, lower eGFR                                                                                          |
| Ishikawa (2012) <sup>127</sup>         | Lung resection                             | Retrospective cohort | 1,129           | AKIN                                  | 5.9%          | Hypertension, peripheral vascular disease, hetastarch use, lower eGFR, open procedure, prior use of ARB                                                       |
| Kim (2013) <sup>128</sup>              | Gastric cancer surgery                     | Retrospective cohort | 4,718           | KDIGO                                 | 14.4%         | Male gender, hypertension, COPD, hypoalbuminemia, diuretics, vasopressors, contrast agents, PRBCs                                                             |
| Bravi (2019) <sup>116</sup>            | Partial nephrectomy                        | Retrospective cohort | 1,893           | RIFLE                                 | 20.4%         | Male gender, older age, lower eGFR, diabetes, hypertension, open surgery                                                                                      |
| Bang (2018) <sup>129</sup>             | Colorectal Surgery                         | Retrospective cohort | 4,320           | AKIN, RIFLE                           | 9.6%, 5.8%    | NA                                                                                                                                                            |
| Bihorac (2013) <sup>25</sup>           | Major surgery                              | Retrospective cohort | 27,841          | RIFLE                                 | 37%           | NA                                                                                                                                                            |
| Hobson (2015) <sup>130</sup>           | Inpatient surgery                          | Retrospective cohort | 50,314          | RIFLE                                 | 39%           | Older, male gender, African American                                                                                                                          |
| Walker (2016) <sup>131</sup>           | Orthopedic surgeries, neck of femur repair | Retrospective cohort | 11,004          | KDIGO                                 | 11.2%, 13.8%  | NA                                                                                                                                                            |
| Vaught (2015) <sup>132</sup>           | Major inpatient gynaecologic surgery       | Retrospective cohort | 2,341           | RIFLE                                 | 13%           | Older age, malignant tumor, metastatic cancer, emergent surgery, weekend admission, congestive heart failure, chronic pulmonary disease                       |
| Ozragat-Baslanti (2017) <sup>113</sup> | Major inpatient surgery                    | Retrospective cohort | 51,457          | KDIGO                                 | 39%           | NA                                                                                                                                                            |
| Abdullah (2015) <sup>23</sup>          | Laparoscopic bariatric surgery             | Retrospective cohort | 1,230           | KDIGO                                 | 2.9%          | Lower eGFR, angiotensin-converting enzyme inhibitors and angiotensin II receptor blockers, higher body mass index                                             |
| Bonavia (2019) <sup>26</sup>           | Colorectal surgery                         | Retrospective cohort | 1,020           | KDIGO (sCr only, sCr or urine output) | 6.5%, 57.4%   | NA                                                                                                                                                            |
| Kim (2016) <sup>133</sup>              | Total knee arthroplasty                    | Retrospective cohort | 1,309           | KDIGO                                 | 4.4%          | Age, diabetes, uric acid, beta blocker use, diuretics                                                                                                         |
| Rajan (2015) <sup>30</sup>             | Partial nephrectomy                        | Retrospective cohort | 1,955           | AKIN                                  | 39.3%         | Hypertension, open and laparoscopic nephrectomy (vs robotic nephrectomy), duration of surgery, longer ischaemia time, and warm ischaemia (vs. cold ischaemia) |

\*Search strategy: studies with at least 1,000 patients, unselected for post-surgical outcomes (i.e., excluded studies of patients admitted to the ICU after surgery, or surviving until discharge).
